# Supplementary material for: Alternatively activated macrophages promote resolution of necrosis following acute liver injury
Source: PubMed Central journal article supplement (PMC7378576; doi:10.1016/j.jhep.2020.02.031), 2020-08
Supplement: mmc1.pdf [file mmc1.pdf]

## Journal of Hepatology

### CTAT methods

Tables for a “Complete, Transparent, Accurate and Timely account” (CTAT) are now mandatory for all revised submissions. The aim is to enhance the reproducibility of methods.

- Only include the parts relevant to your study
- Refer to the CTAT in the main text as ‘Supplementary CTAT Table’
- Do not add subheadings
- Add as many rows as needed to include all information
- Only include one item per row

**If the CTAT form is not relevant to your study, please outline the reasons why:**

|  |
|--|
|  |
|--|

#### 1.1 Antibodies

| Name                                                                           | Citation | Supplier           | Cat no.     | Clone no.     |
|--------------------------------------------------------------------------------|----------|--------------------|-------------|---------------|
| <b>IHC/IF assays</b>                                                           |          |                    |             |               |
| Anti-FITC                                                                      |          | ThermoFisher       | 71-1900     | Polyclonal    |
| Anti-BrdU                                                                      |          | Abcam              | ab6326      | BU1/75 (ICR1) |
| Anti-HMGB1                                                                     |          | Abcam              | ab18256     | Polyclonal    |
| Anti-HNF4 $\alpha$                                                             |          | Perseus Proteomics | PP-H1415-00 | H1415         |
| Anti-Ly6G                                                                      |          | BioLegend          | 127602      | 1A8           |
| Anti-ERG                                                                       |          | Abcam              | ab92513     | EPR3864       |
| Anti-mCherry (recognises tdTomato)                                             |          | SICGEN             | AB0081-500  | Polyclonal    |
| Anti-CD68                                                                      |          | Abcam              | ab213363    | EPR20545      |
| <b>Flow cytometry conjugated antibodies (anti-mouse, phagocytosis studies)</b> |          |                    |             |               |
| CD11b (BV650)                                                                  |          | eBioscience        | 64-0112-82  | M1/70         |
| CD11b FITC                                                                     |          | eBioscience        | 11-0112-41  | M1/70         |
| Ly-6C V450                                                                     |          | eBioscience        | 48-5932-82  | HK1.4         |
| Ly-6C PerCP/Cy5.5                                                              |          | eBioscience        | 45-5932-82  | HK1.4         |
| CD45.2 AF700                                                                   |          | eBioscience        | 56-0454-82  | 104           |
| F4/80 APC                                                                      |          | Invitrogen         | MF48005     | BM8           |
| Ly-6G PE-Cy7                                                                   |          | BioLegend          | 127618      | 1A8           |
| CD3 PE-Cy7                                                                     |          | BioLegend          | 100220      | 17A2          |
| NK1.1 PE-Cy7                                                                   |          | BioLegend          | 108714      | PK136         |
| CD19 PE-Cy7                                                                    |          | BioLegend          | 115520      | 6D5           |
| CD31 PE-Cy7                                                                    |          | eBioscience        | 25-0311-82  | 390           |
| <b>Flow cytometry conjugated antibodies (anti-mouse, phenotyping)</b>          |          |                    |             |               |
| F4/80 APC                                                                      |          | BioLegend          | 123115      | BM8           |
| CD11b BV650                                                                    |          | BioLegend          | 101239      | M1/70         |
| Ly6G BV421                                                                     |          | BioLegend          | 127627      | 1A8           |
| Ly6C PerCP/Cy5.5                                                               |          | BioLegend          | 128011      | HK1.4         |
| CD115 PE                                                                       |          | BioLegend          | 135505      | AFS98         |
| CD71 BV421                                                                     |          | BioLegend          | 113813      | RI7217        |

|                                                     |  |                 |                              |           |
|-----------------------------------------------------|--|-----------------|------------------------------|-----------|
| CD86 BV421                                          |  | BioLegend       | 105031                       | GL-1      |
| CD83 FITC                                           |  | BioLegend       | 121505                       | Michel-19 |
| I-Ab PerCP/Cy5.5                                    |  | BioLegend       | 116405                       | AF6-120.1 |
| CD206 FITC                                          |  | BioLegend       | 141703                       | C068C2    |
| CD11c                                               |  | BioLegend       | 371503                       | S-HCL-3   |
| <b>Flow cytometry conjugated antibodies (human)</b> |  |                 |                              |           |
| CD45 VioBlue                                        |  | Miltenyi Biotec | 130-113-122                  | 5B1       |
| CD14 PE                                             |  | Miltenyi Biotec | 130-091-242<br>(130-113-147) | TÜK4      |
| CD14 VioBlue                                        |  | Miltenyi Biotec | 130-113-152                  | TÜK4      |
| CD206 FITC                                          |  | Miltenyi Biotec | 130-095-131                  | DCN228    |
| 25F9 APC<br>(eFluor660)                             |  | eBioscience     | 50-0115-42                   | 25F9      |
| CCR2 PE                                             |  | BioLegend       | 357206                       | K036C2    |
| CD163 FITC                                          |  | Miltenyi Biotec | 130-097-626                  | GHI/61.1  |
| CD169 APC                                           |  | BioLegend       | 346008                       | 7-239     |
| CD86 PE                                             |  | BioLegend       | 374206                       | BU63      |
| HLA FITC                                            |  | BioLegend       | 361705                       | Tu39      |

## 1.2 Cell lines

| Name | Citation | Supplier | Cat no. | Passage no. | Authentication test method |
|------|----------|----------|---------|-------------|----------------------------|
|      |          |          |         |             |                            |

## 1.3 Organisms

| Name                     | Citation | Supplier      | Strain                                               | Sex  | Age            | Overall n number                           |
|--------------------------|----------|---------------|------------------------------------------------------|------|----------------|--------------------------------------------|
| Mice (wild-type)         |          | Harlan        | C57CBL/6J<br>OlaHsd                                  | Male | 8-10 weeks old | N=3-11 per group<br>(experiment-dependent) |
| Mice (Immunocompromised) |          | Charles River | NSG -<br>NOD.Cg-<br>PrkdcSCID<br>Il2rgtm1Wjl/Sz<br>J | Male | 12 weeks old   | N=9/10 per group                           |

## 1.4 Sequence based reagents

| Name | Sequence | Supplier |
|------|----------|----------|
|      |          |          |

## 1.5 Biological samples

| Description | Source | Identifier |
|-------------|--------|------------|
|             |        |            |

## 1.6 Deposited data

| Name of repository | Identifier | Link |
|--------------------|------------|------|
|                    |            |      |

|  |  |  |
|--|--|--|
|  |  |  |
|--|--|--|

## 1.7 Software

| Software name | Manufacturer | Version |
|---------------|--------------|---------|
|               |              |         |

## 1.8 Other (e.g. drugs, proteins, vectors etc.)

|                         |               |       |
|-------------------------|---------------|-------|
| Acetaminophen (BioXtra) | Sigma Aldrich | A7085 |
|                         |               |       |

## 1.9 Please provide the details of the corresponding methods author for the manuscript:

Philip Starkey Lewis, PhD  
MRC Centre for Regenerative Medicine  
University of Edinburgh,  
5 Little France Drive,  
Edinburgh,  
EH16 4UU

Email: [pstarkey@staffmail.ed.ac.uk](mailto:pstarkey@staffmail.ed.ac.uk)

## 2.0 Please confirm for randomised controlled trials all versions of the clinical protocol are included in the submission. These will be published online as supplementary information.

|  |
|--|
|  |
|--|
